# Supplementary material
Source: PubMed Central journal article supplement (PMC3993512)
Supplement: JCM.03119-13_zjm999093261so1.pdf [file JCM.03119-13_zjm999093261so1.pdf]

**Supplemental material - table S1.** GenBank accession numbers used in development of assay B.

| <b>Bacterial species</b>  | <b>GenBank accession number</b> | <b>Bacterial species</b>  | <b>GenBank accession number</b> |
|---------------------------|---------------------------------|---------------------------|---------------------------------|
| <i>M. abscessus</i>       | AY271329                        | <i>M. microti</i>         | AY271315                        |
| <i>M. africanum</i>       | AY271330                        | <i>M. scrofulaceum</i>    | AY271317                        |
| <i>M. avium</i>           | AY271322                        | <i>M. smegmatis</i>       | AY271345                        |
| <i>M. bovis</i>           | AY271323                        | <i>M. szulgai</i>         | AY271319                        |
| <i>M. celatum type I</i>  | AY271337                        | <i>M. tuberculosis</i>    | CP000611                        |
| <i>M. fortuitum I</i>     | AY271325                        | <i>M. ulcerans</i> Agy99  | CP000325                        |
| <i>M. gordonae type I</i> | AY271342                        | <i>M. peregrinum</i>      | AY271324                        |
| <i>M. haemophilum</i>     | AY271331                        | <i>M. xenopi</i>          | AY271332                        |
| <i>M. kansasii type I</i> | AY271333                        | <i>E. coli</i>            | NC009800                        |
| <i>M. leprae</i>          | NC002677                        | <i>Staph. aureus</i>      | CP003194                        |
| <i>M. malmoense</i>       | AY271321                        | <i>Staph. epidermidis</i> | NC004461                        |
| <i>M. marinum</i>         | AY271318                        | <i>Str. pyogenes</i>      | CP000260                        |

Table S1 shows the GenBank accession numbers (PubMed, NCBI) that were used for in-silico development of assay B by alignment of (myco-) bacterial *rpoB*-genes using DNASIS Max software (MiraiBio, San Francisco, California).
